# Supplementary material
Source: publisher figshare collection journal article supplement (https://sage.figshare.com/ndownloader/files/15367640)
Supplement: Supplementary file 1 [file 15367640]

Reviewer 2, v2

This paper has is an interesting contribution, even though it still has some major limitations. Therefore, I recommend that it be accepted for publication.
